# Supplementary material for: Tsetse Bloodmeal Analyses Incriminate the Common Warthog Phacochoerus africanus as an Important Cryptic Host of Animal Trypanosomes in Smallholder Cattle Farming Communities in Shimba Hills, Kenya
Source: MDPI journal article supplement (doi:10.3390/pathogens10111501), 2021-11-18
Supplement: s1 [file s1]

**Table S1.** Data on tsetse fly bloodmeal hosts and trypanosome infections in the different study-blocks in Shimba Hills, Kenya.

| Block                                                                                     | Msulwa A  | Katangini | Kidongo  | Kinagodongo | Kipambane | *Kizibe    | Mangawani | Mawia     | Mkanda    | *Mlafyeni | Pengo     | Msulwa Tangini | Msulwa Viriko | Zunguluka | No. (%) trypanosome positive flies |
|-------------------------------------------------------------------------------------------|-----------|-----------|----------|-------------|-----------|------------|-----------|-----------|-----------|-----------|-----------|----------------|---------------|-----------|------------------------------------|
| <b>Latitude</b>                                                                           | -4.26385  | -4.32020  | -4.31760 | -4.32486    | -4.31628  | -4.27156   | -4.34504  | -4.34638  | -4.33767  | -4.19133  | -4.22542  | -4.28598       | -4.31175      | -4.30689  |                                    |
| <b>Longitude</b>                                                                          | 39.46818  | 39.36612  | 39.38276 | 39.35194    | 39.41810  | 39.33925   | 39.26604  | 39.30693  | 39.32394  | 39.39329  | 39.38154  | 39.44956       | 39.43014      | 39.26701  |                                    |
| <b>No. of tsetse flies examined</b>                                                       | 27        | 25        | 12       | 17          | 15        | 134        | 36        | 36        | 8         | 160       | 196       | 2              | 6             | 22        | 696                                |
| <b>No. (%) of blood-fed tsetse flies</b>                                                  | 18(66.67) | 11(44.00) | 6(50.00) | 8(47.06)    | 8(53.33)  | 64(47.76)  | 19(52.78) | 16(44.44) | 1(12.5)   | 88(55)    | 91(46.43) | 2(100)         | 2(33.33)      | 14(63.64) | 348 (50.00)                        |
| <b>No. (%) of tsetse fly individuals positive for both wildlife &amp; livestock feeds</b> | 0(0.00)   | 0(0.00)   | 0(0.00)  | 0(0.00)     | 1(12.50)  | 3(4.69)    | 0(0.00)   | 1(6.25)   | 0(0.00)   | 3(3.41)   | 5(5.49)   | 0(0.00)        | 1(50.00)      | 0(0.00)   | 14 (2.01)                          |
| <b>Blood meal hosts [No (%)]</b>                                                          |           |           |          |             |           |            |           |           |           |           |           |                |               |           |                                    |
| Baboon (n=62)                                                                             | 2(11.11)  | 4(36.36)  | 2(28.57) | 0(0.00)     | 2(22.22)  | 7(10.61)   | 1(5.00)   | 1(5.88)   | 0(0.00)   | 14(15.05) | 19(19.00) | 0(0.00)        | 0(0.00)       | 10(62.50) | 2(3.22)                            |
| Cattle (n=79)                                                                             | 7(38.89)  | 2(18.18)  | 0(0.00)  | 4(50.00)    | 3(33.33)  | 19(28.79)  | 7(35.00)  | 4(23.53)  | 0(0.00)   | 14(15.05) | 17(17.00) | 0(0.00)        | 1(33.33)      | 1(6.25)   | 6(7.59)                            |
| Warthog (n=121)                                                                           | 7(38.89)  | 2(18.18)  | 1(14.29) | 1(12.50)    | 1(11.11)  | 27(40.91)  | 5(25.00)  | 5(29.41)  | 1(100.00) | 47(53.41) | 19(19.00) | 1(50.00)       | 1(33.33)      | 3(18.75)  | 19 (15.70)                         |
| Sheep (n=40)                                                                              | 2(11.11)  | 0(0.00)   | 2(28.57) | 1(12.50)    | 1(11.11)  | 4(6.06)    | 1(5.00)   | 2(11.77)  | 0(0.00)   | 6(6.45)   | 19(19.00) | 0(0.00)        | 1(33.33)      | 1(6.25)   | 3 (7.50)                           |
| Buffalo (n=8)                                                                             | 0(0.00)   | 1(9.09)   | 0(0.00)  | 1(12.50)    | 1(11.11)  | 1(1.52)    | 1(5.00)   | 1(5.88)   | 0(0.00)   | 0(0.00)   | 1(1.00)   | 1(50.00)       | 0(0.00)       | 0(0.00)   | 1 (12.50)                          |
| Human (n=26)                                                                              | 0(0.00)   | 1(9.09)   | 1(14.29) | 0(0.00)     | 1(11.11)  | 2(3.03)    | 5(25.00)  | 2(11.77)  | 0(0.00)   | 7(7.53)   | 7(7.69)   | 0(0.00)        | 0(0.00)       | 0(0.00)   | 2 (7.69)                           |
| Suni (n=4)                                                                                | 0(0.00)   | 1(9.09)   | 0(0.00)  | 0(0.00)     | 0(0.00)   | 2(3.03)    | 0(0.00)   | 0(0.00)   | 0(0.00)   | 0(0.00)   | 1(1.00)   | 0(0.00)        | 0(0.00)       | 0(0.00)   | 3 (75.00)                          |
| red river hog (n=13)                                                                      | 0(0.00)   | 0(0.00)   | 1(14.29) | 0(0.00)     | 0(0.00)   | 1(1.52)    | 0(0.00)   | 0(0.00)   | 0(0.00)   | 0(0.00)   | 11(11.00) | 0(0.00)        | 0(0.00)       | 0(0.00)   | 2 (15.38)                          |
| Elephant (n=5)                                                                            | 0(0.00)   | 0(0.00)   | 0(0.00)  | 1(12.50)    | 0(0.00)   | 1(1.52)    | 0(0.00)   | 0(0.00)   | 0(0.00)   | 1(1.08)   | 2(2.00)   | 0(0.00)        | 0(0.00)       | 0(0.00)   | 1 (20.00)                          |
| Donkey (n=3)                                                                              | 0(0.00)   | 0(0.00)   | 0(0.00)  | 0(0.00)     | 0(0.00)   | 3(4.55)    | 0(0.00)   | 0(0.00)   | 0(0.00)   | 0(0.00)   | 0(0.00)   | 0(0.00)        | 0(0.00)       | 0(0.00)   | 1 (33.33)                          |
| Bushbuck (n=4)                                                                            | 0(0.00)   | 0(0.00)   | 0(0.00)  | 0(0.00)     | 0(0.00)   | 0(0.00)    | 0(0.00)   | 1(5.88)   | 0(0.00)   | 2(2.15)   | 0(0.00)   | 0(0.00)        | 0(0.00)       | 1(6.25)   | 0                                  |
| Impala (n=3)                                                                              | 0(0.00)   | 0(0.00)   | 0(0.00)  | 0(0.00)     | 0(0.00)   | 0(0.00)    | 0(0.00)   | 1(5.88)   | 0(0.00)   | 2(2.15)   | 0(0.00)   | 0(0.00)        | 0(0.00)       | 0(0.00)   | 0                                  |
| Goat (n=4)                                                                                | 0(0.00)   | 0(0.00)   | 0(0.00)  | 0(0.00)     | 0(0.00)   | 0(0.00)    | 0(0.00)   | 0(0.00)   | 0(0.00)   | 0(0.00)   | 4(4.00)   | 0(0.00)        | 0(0.00)       | 0(0.00)   | 0                                  |
| Nil                                                                                       | 9         | 14        | 6        | 9           | 7         | 70         | 17        | 20        | 7         | 72        | 105       | 0              | 4             | 8         | 348                                |
| <b>No. (%) of trypanosome positive flies</b>                                              | 5(18.52)  | 2(8.00)   | 0        | 3 (17.65)   | 3 (20.00) | 18 (13.43) | 1 (2.78)  | 2 (5.56)  | 0         | 13 (8.13) | 9 (4.59)  | 0              | 2 (33.33)     | 2 (9.09)  | 60 (8.62)                          |

\*warthog and cattle multiple-feeds in tsetse flies.

Cells highlighted in green to indicate blocks where tsetse flies had fed on multiple-hosts comprising of wildlife and livestock.

Cells highlighted in red to indicate blocks where tsetse flies were positive for trypanosome infections.
